# Supplementary material
Source: Springer Nature journal article supplement (https://www.springermedizin.de/resource/supplementary/13023_2009_163_MOESM3_ESM.pdf/9641766)

A

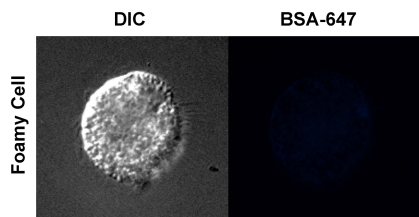

B

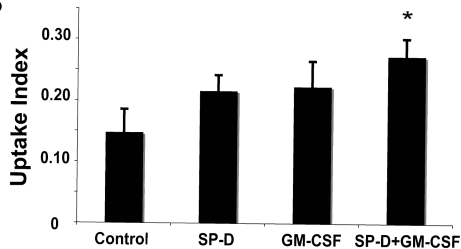

C

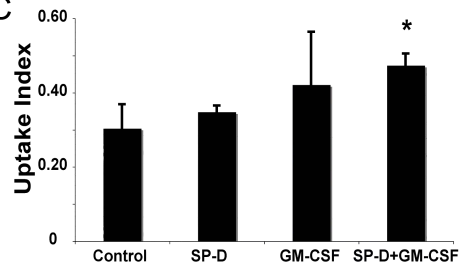

D

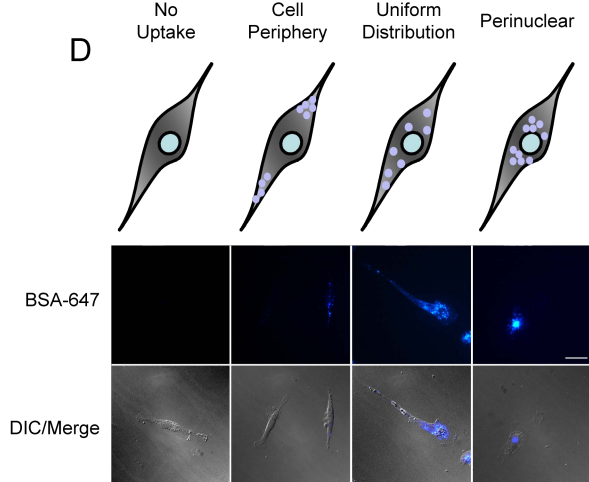

E

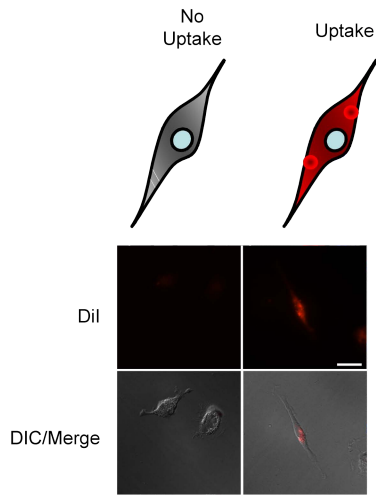

Supplement: MOESM3 [file 9641766]
